# Supplementary material
Source: PubMed Central journal article supplement (PMC5691410)
Supplement: AEM.01498-17_zam999118181s1.pdf [file AEM.01498-17_zam999118181s1.pdf]

## SUPPLEMENTAL MATERIAL

Expression of a peptidoglycan hydrolase from lytic bacteriophages Atu\_ph02 and Atu\_ph03 triggers lysis of *Agrobacterium tumefaciens*

Hedieh Attai, Jeanette Rimbey<sup>\*</sup>, George P. Smith, and Pamela J.B. Brown<sup>#</sup>

Division of Biological Sciences, University of Missouri, Columbia, Missouri, USA

Running Head: Lytic bacteriophages and lysis proteins impact *A. tumefaciens* growth

<sup>\*</sup>Current address: Department of Biological and Insect Control, DuPont-Pioneer,

Johnston, Iowa, USA

<sup>#</sup>Address correspondence to Pamela J.B. Brown, brownpb@missouri.edu

### 1) SUPPLEMENTAL METHODS

### 2) SUPPLEMENTAL TABLES S1-S2

### 3) SUPPLEMENTAL FIGURES AND LEGENDS S1 – S4

### 4) SUPPLEMENTAL MOVIE LEGENDS

### 5) SUPPLEMENTAL REFERENCES

## SUPPLEMENTAL METHODS

**Clonal isolation of bacteriophage strains.** Water samples were filtered by passing through a 0.45 µm membrane (Millipore Ultrafree – CL, Low-binding Durapore PVDP membrane) and 890 µl of filtrate was mixed with 100 µl 10X LB and 10 µl *A. tumefaciens* C58 at a starting OD<sub>600</sub> of ~0.2. Cultures were incubated at 28°C in LB broth for 16 h while shaking. Cultures that appeared clear were screened for plaque formation. If the culture was turbid, supernatants were collected by centrifugation at 3,000 x g for 10 min and 100 µl filtrate were mixed with 100 µl bacteria (OD<sub>600</sub> ~0.2) for another round of amplification. If cultures remained turbid after 5 rounds of amplification, the filtrate was considered to be negative for lytic activity. Filtrates that caused clearing of the bacterial culture within 5 rounds of amplification were examined for evidence of phage activity. Filtrates were screened for phage activity using a spot assay for detection of plaques. Whole plate plaque assays were performed using filtrates which produced plaques in the spot assay. Individual plaques were suspended in Dulbecco's phosphate-buffered saline (DPBS, Mediatech, Inc., Manassas, VA, USA) with gelatin added (1:20). Three rounds of purification comprised of selecting individual plaques after whole plate plaque assays were completed for each bacteriophage to ensure homogenous bacteriophage populations.

**Concentration and partial purification of virions.** Concentrated phage stocks were produced by polyethylene glycol (PEG) precipitation. For PEG precipitation, filtered lysates were scaled up to 1 L and centrifuged at 11,000 x g for 20 min at 4°C to remove bacterial cells. To the supernatants, 400 µl 10 mg/ml RNase A (Sigma) and 1 ml 3.45 mg/ml DNase I (Sigma) were added for removal of bacterial genomic DNA and RNAs.

After 1 h of stirring at room temperature, NaCl (final concentration of 500 mM) and 10% w/w PEG 8000 (Fisher) were added and the solution was stirred for 2 h until dissolved. Bacteriophages were precipitated for 16 h at 4°C. Precipitated bacteriophages were collected by centrifugation at 11,000 x g for 30 min at 4°C and resuspended in 30 ml DPBS. The bacteriophage solution was incubated with shaking overnight at 4°C. Insoluble material was removed and the supernatant was recovered. NaCl (final concentration 0.5M) and PEG 8000 (10% w/w) were added to the supernatant and the solution rotated for 2 h at 4°C. Bacteriophages were precipitated, collected by centrifuging for 20 min at 17,000 x g at 4°C, and resuspended 8 ml DPBS. The bacteriophage solution was rotated overnight at 4°C. This viscous solution was centrifuged at 17,000 x g for 2 min at 4°C and the supernatant was collected. The bacteriophage solution was mixed with 300 µl 10 mM phenol red and 22 ml DPBS and centrifuged at 17,000 x g for 30 min and the supernatant was collected. The supernatant was overlayed with a 2 ml sucrose (5% w/w) cushion and ultracentrifuged at 141,000 x g for 2 h at 4°C. The supernatant was removed and the pellet was washed in DPBS and dissolved in 1 ml DPBS. All phage stocks were stored at 4°C.

**Preparation of virion DNA.** Two 500-µl portions of partially purified virions in 1.5-ml microtubes were extracted twice with 500 µl neutralized phenol (water-saturated phenol shaken twice with 1/10 vol 1 M Tris.HCl pH 8, discarding the upper phase each time) and once with 500 µl chloroform (a 24:1 mixture of chloroform and isoamyl alcohol), each time discarding the organic (lower) phases. To the final aqueous phases were added 40 µl 3 M sodium acetate, pH adjusted to 6 with acetic acid, and 1 ml ethanol; precipitates

were pelleted by a 10-min centrifugation in a microfuge; supernatants were aspirated; pellets were gently washed by adding 1 ml freezer-cold 70% v/v ethanol and aspirating the liquid; pellets were air-dried, dissolved in 100  $\mu$ l TE (10 mM Tris.HCl pH 7.5, 1 mM Na<sub>2</sub>EDTA), and centrifuged 10 min in a microfuge to clear insoluble material; supernatants were pooled and stored at -20°C.

**DNA restriction analysis.** Phage genomic DNA was digested with restriction endonucleases from New England Biolabs using the standard protocol. All reactions contained 2.5  $\mu$ g DNA and were incubated at 37°C for 2 h. Restriction patterns were analyzed on a 0.7% agarose gel, which ran at 100 V for 1 h and was stained with SYBR Safe DNA Gel Stain (Thermo Scientific).

## SUPPLEMENTAL TABLES

**Table S1.** Comparison of gene products encoded in Atu\_ph02 and Atu\_ph03

| Atu_ph03     |                           | Atu_ph02     |                           | percent identity <sup>b</sup> |
|--------------|---------------------------|--------------|---------------------------|-------------------------------|
| gene product | length in AA <sup>a</sup> | gene product | length in AA <sup>a</sup> |                               |
| gp1          | 41                        | gp1          | 41                        | 72.5                          |
| gp2          | 173                       | gp2          | 173                       | 100                           |
| gp3          | 336                       | gp3          | 336                       | 100                           |
| gp4          | 415                       | gp4          | 409                       | 99.26                         |
| gp5          | 134                       | gp5          | 134                       | 100                           |
| gp6          | 449                       | gp6          | 449                       | 100                           |
| gp7          | 68                        | gp7          | 68                        | 83.58                         |
| gp8          | 39                        | gp8          | 163                       | 77.78                         |
| gp9          | 123                       | gp8          | 163                       | 92.62                         |
| gp10         | 486                       | gp9          | 486                       | 99.79                         |
| gp11         | 224                       | gp10         | 210                       | 69.78                         |
| gp12         | 55                        |              |                           |                               |
| gp13         | 331                       | gp11         | 337                       | 93.75                         |
| gp14         | 180                       | gp12         | 181                       | 88.27                         |
| gp15         | 786                       | gp13         | 787                       | 98.09                         |
| gp16         | 291                       | gp14         | 291                       | 100                           |
| gp17         | 77                        | gp15         | 77                        | 100                           |
| gp18         | 38                        | gp16         | 38                        | 100                           |
| gp19         | 317                       | gp17         | 317                       | 98.73                         |
| gp20         | 61                        | gp18         | 61                        | 100                           |
| gp21         | 77                        | gp19         | 77                        | 96.05                         |
| gp22         | 128                       | gp20         | 128                       | 100                           |
| gp23         | 816                       | gp21         | 816                       | 99.88                         |
| gp24         | 57                        | gp22         | 57                        | 100                           |
| gp25         | 66                        | gp23         | 66                        | 100                           |
| gp26         | 155                       | gp24         | 155                       | 100                           |
| gp27         | 88                        |              |                           |                               |
| gp28         | 68                        | gp25         | 68                        | 100                           |
| gp29         | 533                       | gp26         | 533                       | 99.62                         |
| gp30         | 296                       | gp27         | 296                       | 99.66                         |

| Atu_ph03     |                           | Atu_ph02     |                           | percent identity <sup>b</sup> |
|--------------|---------------------------|--------------|---------------------------|-------------------------------|
| gene product | length in AA <sup>a</sup> | gene product | length in AA <sup>a</sup> |                               |
| gp31         | 327                       | gp28         | 327                       | 100                           |
| gp32         | 212                       | gp29         | 212                       | 99.53                         |
| gp33         | 823                       | gp30         | 823                       | 99.64                         |
| gp34         | 169                       | gp31         | 169                       | 99.4                          |
| gp35         | 1192                      | gp32         | 1192                      | 99.83                         |
| gp36         | 1255                      | gp33         | 1255                      | 99.68                         |
| gp37         | 507                       | gp34         | 507                       | 98.62                         |
| gp38         | 181                       | gp35         | 181                       | 98.33                         |
| gp39         | 59                        | gp36         | 59                        | 100                           |
| gp40         | 107                       | gp37         | 107                       | 100                           |
| gp41         | 612                       | gp38         | 623                       | 100                           |
| gp42         | 122                       | gp39         | 122                       | 100                           |
| gp43         | 91                        | gp40         | 91                        | 100                           |
| gp44         | 149                       | gp41         | 149                       | 99.32                         |
| gp45         | 64                        | gp42         | 64                        | 100                           |
| gp46         | 289                       | gp43         | 289                       | 98.96                         |
| gp47         | 47                        | gp44         | 47                        | 94.59                         |
| gp48         | 222                       | gp45         | 222                       | 98.19                         |
| gp49         | 124                       | gp46         | 124                       | 100                           |
| gp50         | 61                        | gp47         | 60                        | 93.22                         |
|              |                           | gp48         | 104                       |                               |
| gp51         | 65                        | gp49         | 65                        | 85.94                         |
| gp52         | 88                        | gp50         | 88                        | 49.33                         |
| gp53         | 50                        |              |                           |                               |
| gp54         | 89                        | gp51         | 105                       | 59.00                         |
| gp55         | 107                       | gp52         | 107                       | 93.40                         |
| gp56         | 78                        | gp53         | 78                        | 98.70                         |
| gp57         | 91                        | gp54         | 95                        | 100                           |
| gp58         | 40                        | gp55         | 40                        | 100                           |

<sup>a</sup>Length of each gene product is given in amino acids (AA)

<sup>b</sup>Percent identities were determined by blastx analysis using each predicted ORF in Atu\_ph03 as query against the protein database for Atu\_ph02

**Table S2.** Similarity of putative Atu\_ph03 proteins to proteins in select bacteriophages

|              |              | Similarity of putative proteins in select bacteriophages<br>E-value (percent identity) <sup>a</sup> |                                      |                                     |                                    |                                      |                                      | Putative Function <sup>b</sup>                   |
|--------------|--------------|-----------------------------------------------------------------------------------------------------|--------------------------------------|-------------------------------------|------------------------------------|--------------------------------------|--------------------------------------|--------------------------------------------------|
| Atu_ph03     |              | Rhe_phe2                                                                                            | Rhe_phe8                             | MedPE-SWcel-C56                     | T7                                 | phiKMV                               | T5                                   |                                                  |
| gene product | length in AA |                                                                                                     |                                      |                                     |                                    |                                      |                                      |                                                  |
| gp1          | 41           | -                                                                                                   | -                                    | -                                   | -                                  | -                                    | -                                    | ORFan                                            |
| gp2          | 173          | gp014<br>8e <sup>-10</sup><br>(35%)                                                                 | gp013<br>2e <sup>-09</sup><br>(34%)  | -                                   | -                                  | -                                    | -                                    | Hypothetical protein                             |
| gp3          | 336          | -                                                                                                   | -                                    | -                                   | -                                  | -                                    | -                                    | Hypothetical peptidoglycan binding protein (PPH) |
| gp4          | 415          | -                                                                                                   | -                                    | -                                   | -                                  | -                                    | -                                    | DNA primase                                      |
| gp5          | 134          | gp020<br>8e <sup>-24</sup><br>(42%)                                                                 | gp020<br>9e <sup>-24</sup><br>(42%)  | gp17<br>5e <sup>-08</sup><br>(28%)  | -                                  | -                                    | -                                    | DNA primase                                      |
| gp6          | 449          | gp021<br>2e <sup>-141</sup><br>(49%)                                                                | gp021<br>2e <sup>-141</sup><br>(49%) | gp19<br>1e <sup>-124</sup><br>(43%) | -                                  | gp15<br>7e <sup>-59</sup><br>(33%)   | -                                    | DNA helicase                                     |
| gp7          | 68           | -                                                                                                   | -                                    | -                                   | -                                  | -                                    | -                                    | ORFan                                            |
| gp8          | 39           | -                                                                                                   | -                                    | -                                   | -                                  | -                                    | -                                    | ORFan                                            |
| gp9          | 123          | -                                                                                                   | -                                    | -                                   | -                                  | -                                    | -                                    | ORFan                                            |
| gp10         | 486          | gp022<br>3e <sup>-159</sup><br>(49%)                                                                | gp022<br>3e <sup>-159</sup><br>(48%) | gp20<br>6e <sup>-119</sup><br>(43%) | -                                  | -                                    | gp004<br>7e <sup>-103</sup><br>(38%) | A1 protein                                       |
| gp11         | 224          | -                                                                                                   | -                                    | -                                   | -                                  | -                                    | -                                    | Hypothetical protein                             |
| gp12         | 55           | -                                                                                                   | -                                    | -                                   | -                                  | -                                    | -                                    | ORFan                                            |
| gp13         | 331          | gp026<br>2e <sup>-46</sup><br>(35%)                                                                 | gp026<br>2e <sup>-46</sup><br>(34%)  | gp23<br>3e <sup>-21</sup><br>(28%)  | -                                  | -                                    | -                                    | ATP-dependent DNA ligase                         |
| gp14         | 180          | -                                                                                                   | -                                    | -                                   | -                                  | -                                    | -                                    | ORFan                                            |
| gp15         | 786          | gp028<br>0.0<br>(52%)                                                                               | gp028<br>0.0<br>(52%)                | gp26<br>0.0<br>(49%)                | -                                  | gp 19<br>5e <sup>-114</sup><br>(32%) | -                                    | DNA-directed DNA polymerase                      |
| gp16         | 291          | gp029<br>9e <sup>-91</sup><br>(52%)                                                                 | gp029<br>8e <sup>-92</sup><br>(53%)  | gp28<br>3e <sup>-39</sup><br>(35%)  | -                                  | gp21<br>3e <sup>-27</sup><br>(33%)   | -                                    | Hypothetical protein                             |
| gp17         | 77           | -                                                                                                   | -                                    | -                                   | -                                  | -                                    | -                                    | ORFan                                            |
| gp18         | 38           | -                                                                                                   | -                                    | -                                   | -                                  | -                                    | -                                    | ORFan                                            |
| gp19         | 317          | gp031<br>2e <sup>-125</sup><br>(56%)                                                                | gp031<br>2e <sup>-125</sup><br>(56%) | gp29<br>3e <sup>-76</sup><br>(41%)  | -                                  | gp22<br>6e <sup>-28</sup><br>(32%)   | -                                    | 5'-3' exonuclease                                |
| gp20         | 61           | -                                                                                                   | -                                    | -                                   | -                                  | -                                    | -                                    | ORFan                                            |
| gp21         | 77           | -                                                                                                   | -                                    | -                                   | -                                  | -                                    | -                                    | ORFan                                            |
| gp22         | 128          | gp034<br>2e <sup>-20</sup><br>(42%)                                                                 | gp034<br>1e <sup>-26</sup><br>(42%)  | gp32<br>1e <sup>-25</sup><br>(37%)  | -                                  | gp23<br>2e <sup>-16</sup><br>(38%)   | -                                    | Recombination endonuclease VII                   |
| gp23         | 816          | gp036<br>0.0<br>(49%)                                                                               | gp037<br>0.0<br>(48%)                | gp33<br>0.0<br>(42%)                | gp1<br>3e <sup>-123</sup><br>(49%) | gp26<br>1e <sup>-96</sup><br>(29%)   | -                                    | T7-like RNA polymerase                           |
| gp24         | 57           | gp037<br>4e <sup>-15</sup><br>(60%)                                                                 | gp038<br>3e <sup>-13</sup><br>(60%)  | -                                   | -                                  | -                                    | -                                    | Hypothetical protein                             |

|      |      |                                      |                                      |                                     |                                    |                                     |   |                                       |
|------|------|--------------------------------------|--------------------------------------|-------------------------------------|------------------------------------|-------------------------------------|---|---------------------------------------|
| gp25 | 66   | -                                    | -                                    | -                                   | -                                  | -                                   | - | Hypothetical protein                  |
| gp26 | 155  | -                                    | -                                    | -                                   | -                                  | -                                   | - | N-acetyltransferase                   |
| gp27 | 88   | -                                    | -                                    | -                                   | -                                  | -                                   | - | ORFan                                 |
| gp28 | 68   | -                                    | -                                    | -                                   | -                                  | -                                   | - | ORFan                                 |
| gp29 | 533  | gp043<br>1e <sup>-173</sup><br>(50%) | gp042<br>9e <sup>-176</sup><br>(48%) | gp37<br>9e <sup>-104</sup><br>(36%) | gp8<br>8e <sup>-55</sup><br>(29%)  | gp30<br>3e <sup>-37</sup><br>(29%)  | - | Tail-head connector protein           |
| gp30 | 296  | gp043<br>1e <sup>-41</sup><br>(38%)  | gp044<br>1e <sup>-40</sup><br>(38%)  | gp38<br>8e <sup>-19</sup><br>(31%)  | -                                  | gp31<br>0.001<br>(30%)              | - | Capsid assembly protein               |
| gp31 | 327  | gp044<br>7e <sup>-154</sup><br>(66%) | gp045<br>2e <sup>-153</sup><br>(66%) | gp39<br>8e <sup>-123</sup><br>(53%) | -                                  | gp32<br>3e <sup>-33</sup><br>(27%)  | - | Major capsid protein                  |
| gp32 | 212  | gp045<br>5e <sup>-60</sup><br>(43%)  | gp046<br>5e <sup>-60</sup><br>(43%)  | -                                   | -                                  | -                                   | - | Tail tubular protein A                |
| gp33 | 823  | gp046<br>0.0<br>(44%)                | gp047<br>0.0<br>(44%)                | gp41<br>9e <sup>-92</sup><br>(29%)  | gp12<br>5e <sup>-62</sup><br>(27%) | gp34<br>1e <sup>-46</sup><br>(28%)  | - | Tail tubular protein B                |
| gp34 | 169  | gp047<br>4e <sup>-18</sup><br>(40%)  | gp048<br>4e <sup>-18</sup><br>(40%)  | -                                   | -                                  | -                                   | - | Internal virion protein               |
| gp35 | 1192 | gp048<br>1e <sup>-68</sup><br>(43%)  | gp049<br>1e <sup>-68</sup><br>(43%)  | -                                   | -                                  | -                                   | - | Cell wall hydrolase;<br>M15 peptidase |
| gp36 | 1255 | gp049<br>0.0<br>(33%)                | gp050<br>0.0<br>(33%)                | gp44<br>5e <sup>-78</sup><br>(27%)  | -                                  | gp37<br>1e <sup>-19</sup><br>(24%)  | - | Internal virion protein               |
| gp37 | 507  | gp050<br>3e <sup>-29</sup><br>(46%)  | gp051<br>2e <sup>-28</sup><br>(46%)  | gp45<br>1e <sup>-19</sup><br>(41%)  | -                                  | -                                   | - | Tail fiber protein                    |
| gp38 | 181  | -                                    | -                                    | -                                   | -                                  | -                                   | - | Hypothetical protein                  |
| gp39 | 59   | gp052<br>3e <sup>-13</sup><br>(41%)  | gp053<br>3e <sup>-12</sup><br>(36%)  | -                                   | -                                  | -                                   | - | Hypothetical protein                  |
| gp40 | 107  | gp053<br>2e <sup>-20</sup><br>(41%)  | -                                    | gp47<br>1e <sup>-09</sup><br>(33%)  | -                                  | gp42<br>5e <sup>-05</sup><br>(33%)  | - | Terminase, small subunit              |
| gp41 | 612  | gp054<br>0.0<br>(65%)                | gp055<br>0.0<br>(64%)                | gp48<br>0/0<br>(58%)                | gp19<br>4e <sup>-87</sup><br>(35%) | gp43<br>1e <sup>-132</sup><br>(40%) | - | Terminase, large subunit              |
| gp42 | 122  | gp055<br>1e <sup>-14</sup><br>(37%)  | gp056<br>1e <sup>-14</sup><br>(37%)  | -                                   | -                                  | -                                   | - | Hypothetical protein                  |
| gp43 | 91   | -                                    | -                                    | -                                   | -                                  | -                                   | - | ORFan                                 |
| gp44 | 149  | -                                    | -                                    | -                                   | -                                  | -                                   | - | ORFan                                 |
| gp45 | 64   | -                                    | -                                    | -                                   | -                                  | -                                   | - | ORFan                                 |
| gp46 | 289  | -                                    | -                                    | -                                   | -                                  | -                                   | - | Hypothetical protein                  |
| gp47 | 47   | -                                    | -                                    | -                                   | -                                  | -                                   | - | ORFan                                 |
| gp48 | 222  | gp006<br>1e <sup>-25</sup><br>(34%)  | gp004<br>6e <sup>-26</sup><br>(35%)  | -                                   | -                                  | -                                   | - | Hypothetical protein                  |
| gp49 | 124  | -                                    | -                                    | -                                   | -                                  | -                                   | - | ORFan                                 |
| gp50 | 61   | -                                    | -                                    | -                                   | -                                  | -                                   | - | ORFan                                 |

|      |     |   |   |   |   |   |   |       |
|------|-----|---|---|---|---|---|---|-------|
| gp51 | 65  | - | - | - | - | - | - | ORFan |
| gp52 | 88  | - | - | - | - | - | - | ORFan |
| gp53 | 50  | - | - | - | - | - | - | ORFan |
| gp54 | 89  | - | - | - | - | - | - | ORFan |
| gp55 | 107 | - | - | - | - | - | - | ORFan |
| gp56 | 78  | - | - | - | - | - | - | ORFan |
| gp57 | 91  | - | - | - | - | - | - | ORFan |
| gp58 | 40  | - | - | - | - | - | - | ORFan |

<sup>a</sup>E-values and percent identity were determined by blastp analysis using each predicted ORF in Atu\_ph03 as query against the protein databases for Rhizobium phage RHEph02 (taxid:1220602), Rhizobium phage RHEph08 (taxid:1220715), Phage MedPE-SWcel-C56 (taxid: 1871314), Bacteriophage T7 (taxid: 10760), Bacteriophage phiKMV (taxid: 204270) and Bacteriophage T5 (taxid: 10726). – indicates that a significant hit was not detected in the pairwise comparison.

<sup>b</sup> ORFans are predicted proteins that do not have significant hits in the nr database (1). Hypothetical proteins share homology with proteins in the nr database.

## SUPPLEMENTAL FIGURES

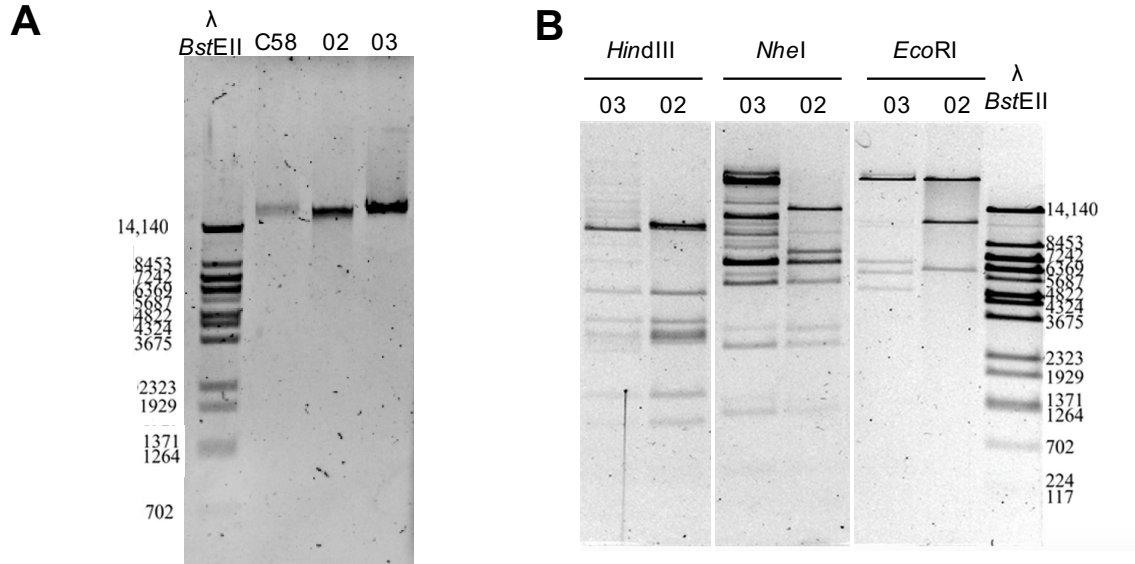

**Supplemental Figure S1.** Initial characterization of phage genomic DNA shows Atu\_ph02 and Atu\_ph03 are distinct. (A) Agarose gel containing undigested genomic DNA extracted from *A. tumefaciens* strain C58, phage Atu\_ph02 (02), and phage Atu\_ph03 (03). (B) Restriction fragment pattern analysis of Atu\_ph02 (02) and Atu\_ph03 (03) genomic DNA digested with *EcoRI*, *NheI*, and *HindIII*.

**A**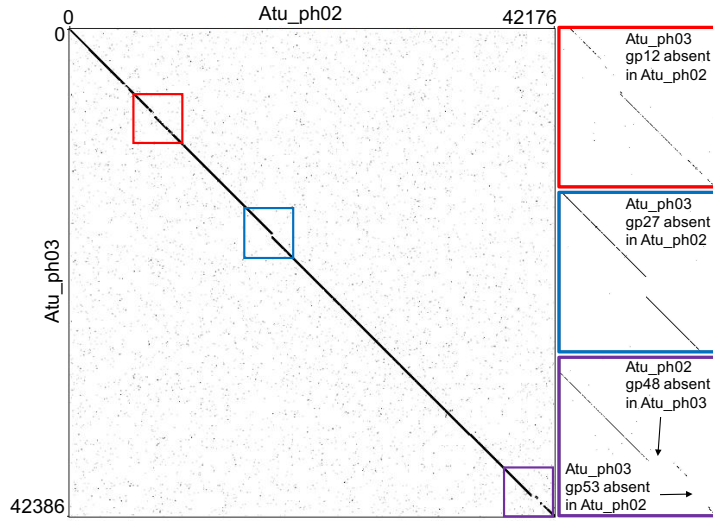**B**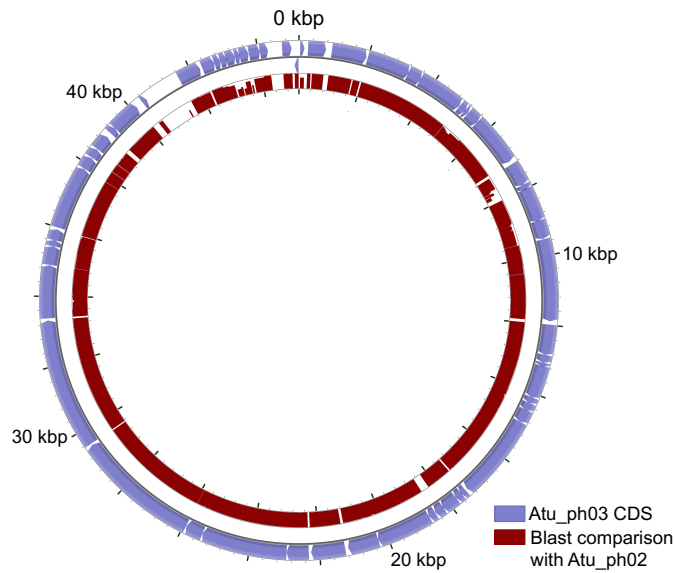

**Supplemental Figure S2.** Phage Atu\_ph03 and Atu\_ph02 are very similar. (A) Dot plot analysis comparing the nucleotide sequences of phages Atu\_ph03 and Atu\_ph02 genomes. Insets highlight areas of difference. (B) Blast analysis of the protein sequences encoded in Atu\_ph02 and Atu\_ph03. The CDS of Atu\_ph03 (blue arrows) and the Blast comparison with Atu\_ph02 (maroon) are shown.

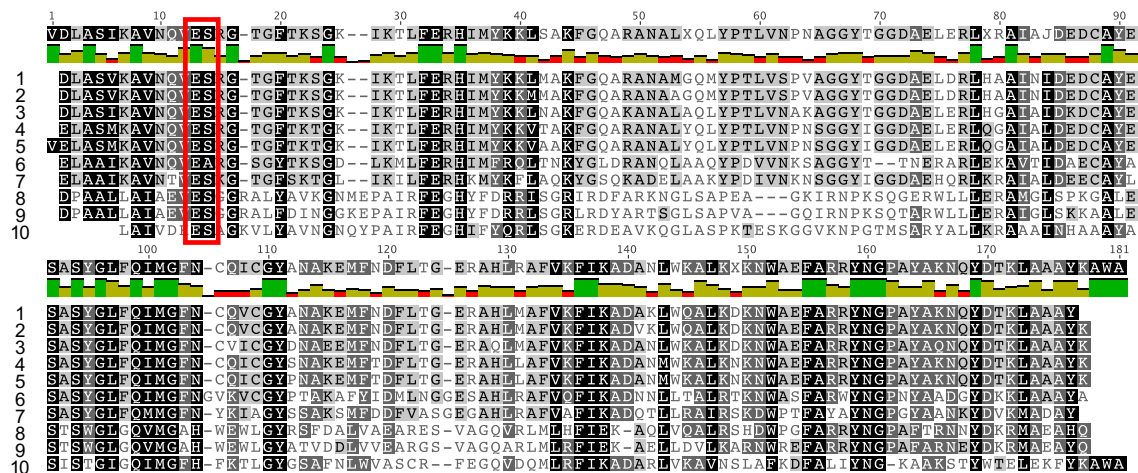

**Supplemental Figure S3.** Clustal alignment of DUF3380 domains from various phage proteins with similarity to the DUF3380 from *Salmonella* phage 10 endolysin and bacterial PG-binding proteins with similarity to the DUF3380 found in PPH. Conserved ES residues are present in all sequences and shown in a red box. Consensus identity for the sequence is mapped along the top of the alignment. Green = 100% identical, gold = 30-100%, red = <30%, no color = 0%. (1) *Dickeya* virus Limestone putative endolysin YP\_007237392.1 (aa 90-260), (2) *Shigella* phage Ag3 hypothetical protein YP\_003358573.1 (aa 90-261), (3) *Klebsiella* phage 0507-KN2-1 phage-encoded PG binding protein YP\_008531963.1 (aa 90-261), (4) *Salmonella* phage 10 endolysin gp110 ANK36008.1 (aa 90-261), (5) *Salmonella* phage Vil phage encoded PG-binding protein YP\_004327457.1 (aa 90-261), (6) *Serratia* phage phiMAM1 PG-binding protein YP\_007349105.1 (aa 90-261), (7) *Erwinia* phage phiEa2809 putative PG binding protein YP\_009147574.1 (90-261), (8) *Brucella abortus* hypothetical protein WP\_006091019.1 (20-190), (9) *Ochrobacterium anthropis* PG-binding protein WP\_061347616.1 (aa 20-190), (10) *Agrobacterium* phage Atu\_ph03 PPH (aa 26-196).

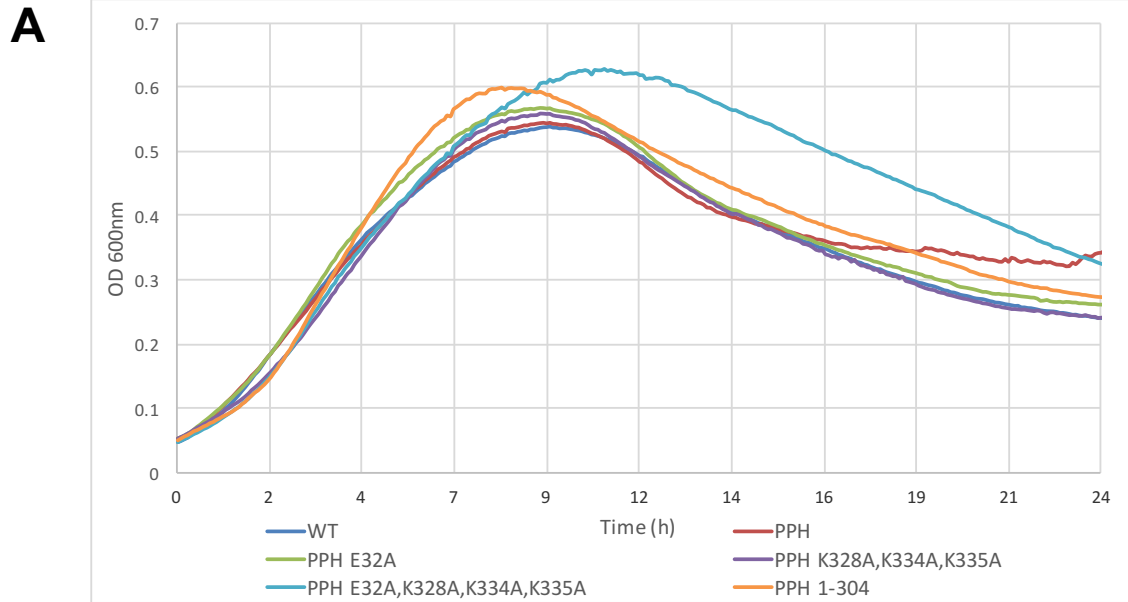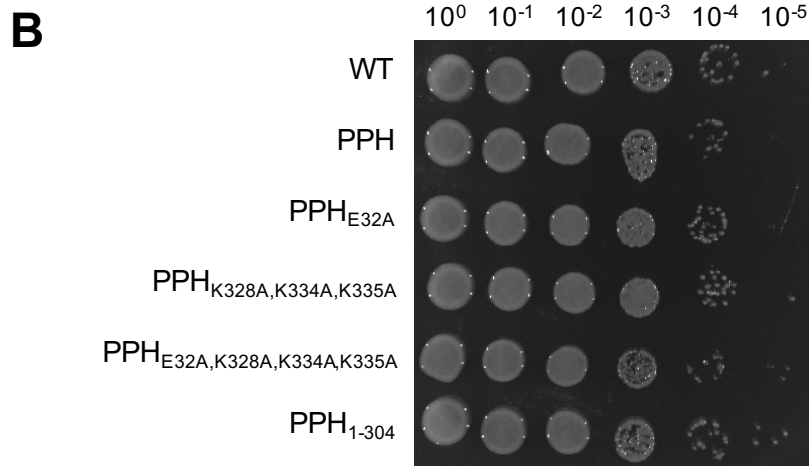

**Supplemental Figure S4.** Growth of *A. tumefaciens* with plasmids to express variants of *pph* under uninduced conditions. (A) Growth curve of *A. tumefaciens* growth when expressing plasmid pSRKKm with variants of *pph* under uninduced conditions. (B) Cell viability of *A. tumefaciens* containing plasmids to express variants of *pph* grown under uninduced conditions.

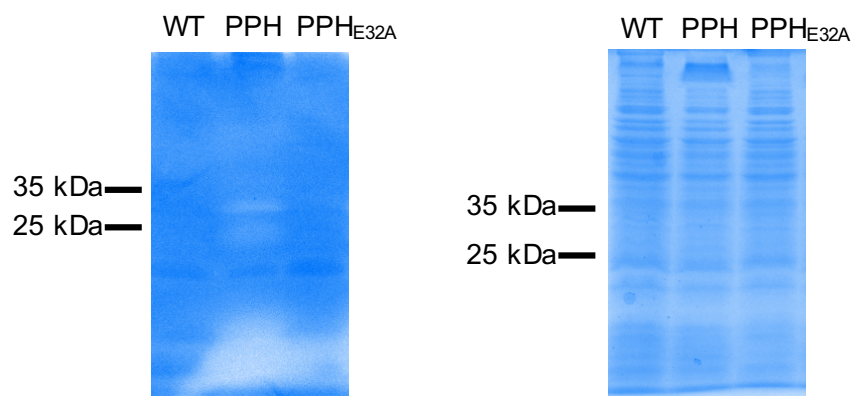

**Supplemental Figure S5.** Clearing of peptidoglycan is observed when PPH is expressed in *A. tumefaciens*. Zymogram (left) and SDS polyacrylamide gel (right) loaded with 30  $\mu$ g whole cell lysates of *A. tumefaciens* lacking PPH, expressing PPH, and expressing PPH<sub>E32A</sub>.

## SUPPLEMENTAL MOVIE LEGENDS

**Supplemental Movie S1.** Time-lapse microscopy in DIC of *A. tumefaciens* strain C58 growing for 7 h, 10 frames per second (fps). Scale bar = 10  $\mu$ m. White asterisk indicates the cell shown in Figure 2B, upper panel.

**Supplemental Movie S2.** Time-lapse microscopy in DIC of cells infected with Atu\_ph03 at an MOI of 0.01 for 7 h, 10 fps. Scale bar = 10  $\mu$ m. White asterisk indicates the cell shown in Figure 2B, lower panel. Fields 1 and 2 show separate representative fields.

**Supplemental Movie S3.** Time-lapse microscopy in DIC of cells infected with Atu\_ph02 at an MOI of 0.01 for 7 h, 10 fps. Scale bar = 10  $\mu$ m. White asterisk indicates the cell shown in Figure 2B, center panel.

**Supplemental Movie S4.** Time-lapse microscopy in DIC of cells expressing pSRKKm-Plac-sfgfp for 16 h, 10 fps. Scale bar = 10  $\mu$ m. White asterisk indicates the cell shown in Figure 5E.

**Supplemental Movie S5.** Time-lapse microscopy in DIC of cells expressing pSRKKm-Plac-PPH growing for 16 h, 10 fps. Scale bar = 10  $\mu$ m. White asterisk indicates the cell shown in Figure 5F.

**Supplemental Movie S6.** Time-lapse microscopy in DIC of cells expressing pSRKKm-Plac-PPH<sub>E32A</sub> growing for 20 h, 10 fps. Scale bar = 10  $\mu$ m. White asterisk indicates the cell shown in Figure 5G.

**Supplemental Movie S7.** Time-lapse microscopy in DIC of cells expressing pSRKKm-Plac-PPH<sub>K328A,K334A,K335A</sub> growing for 7 h, 10 fps. Scale bar = 10  $\mu$ m. White asterisk indicates the cell shown in Figure 5H.

**Supplemental Movie S8.** Time-lapse microscopy in DIC of cells expressing pSRKKm-Plac-PPH<sub>E32A,K328A,K334A,K335A</sub> growing for 16 h, 10 fps. Scale bar = 10  $\mu$ m. White asterisk indicates the cell shown in Figure 5I.

**Supplemental Movie S9.** Time-lapse microscopy in DIC of cells expressing pSRKKm-Plac-PPH<sub>1-304</sub> growing for 16 h, 10 fps. Scale bar = 10  $\mu$ m. White asterisk indicates the cell shown in Figure 5J.

## SUPPLEMENTAL REFERENCES

1. **Yin Y, Fischer D.** 2008. Identification and investigation of ORFans in the viral world. BMC Genomics **9**:24.
